# Supplementary material for: The initial age‐associated decline in early T‐cell progenitors reflects fewer pre‐thymic progenitors and altered signals in the bone marrow and thymus microenvironments
Source: PubMed Central journal article supplement (PMC10410006; doi:10.1111/acel.13870), 2023-05-23
Supplement: ACEL-22-e13870-s001.pdf [file ACEL-22-e13870-s001.pdf]

## Supplementary Figures

### Supplementary Figure 1

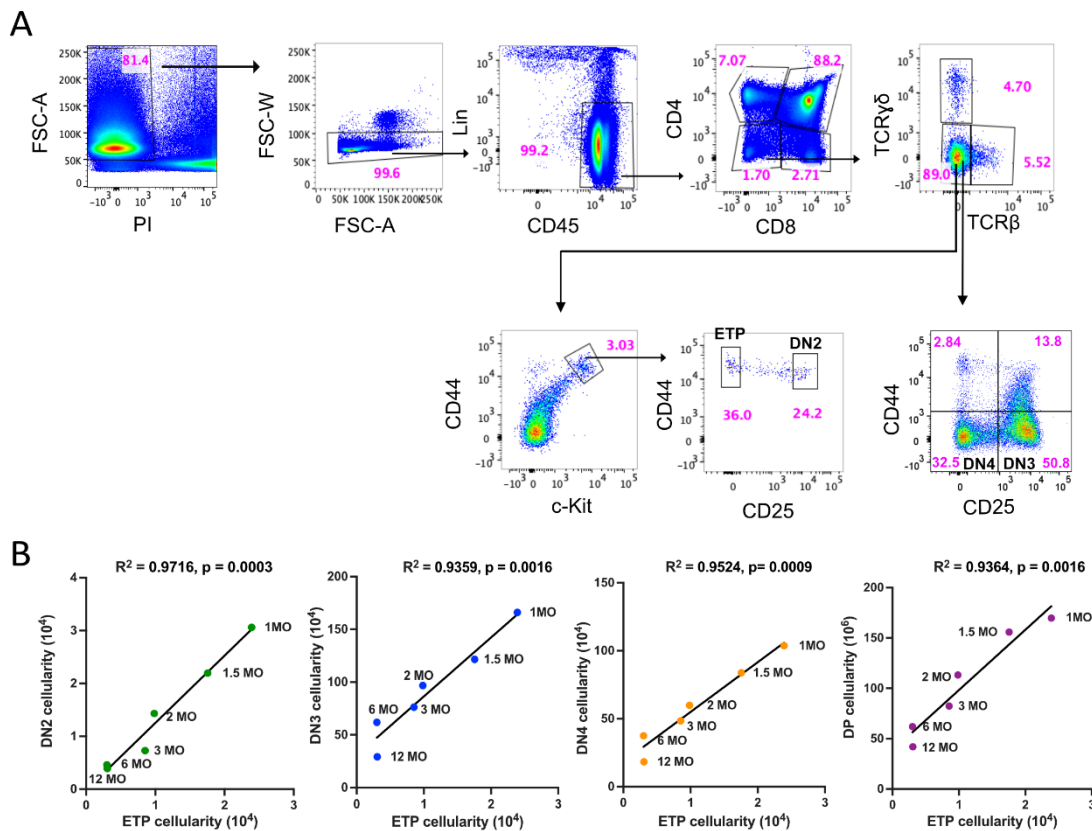

**Supplementary Figure 1, related to Figure 1. Gating strategy for identification of thymocyte subsets and correlation of ETP cellularity with downstream thymocyte subsets. (A)**

Representative flow cytometry plots showing gating strategy for ETPs ( $\text{Lin}^- \text{c-kit}^+ \text{CD44}^+ \text{CD25}^-$ ),

DN2s ( $\text{Lin}^- \text{c-kit}^+ \text{CD44}^+ \text{CD25}^+$ ), DN3s ( $\text{Lin}^- \text{c-kit}^- \text{CD25}^+$ ), DN4s ( $\text{Lin}^- \text{c-kit}^- \text{CD25}^-$ ), as well as DN,

$\text{CD4}^+ \text{CD8}^+$  DP, CD4SP, and CD8SP thymocyte subsets. DN subsets were identified within  $\text{Lin}^-$

$\text{CD4}^- \text{CD8}^- \text{TCR}\alpha\beta^- \text{TCR}\gamma\delta^-$  thymocyte fraction. (B) Linear regression analysis of ETP cellularity and (from left to right) DN2, DN3, DN4 and DP cellularity at each age.  $R^2$  = coefficient of correlation.

Symbols represent data from an average of 7-14 mice at each age.

## Supplementary Figure 2

A

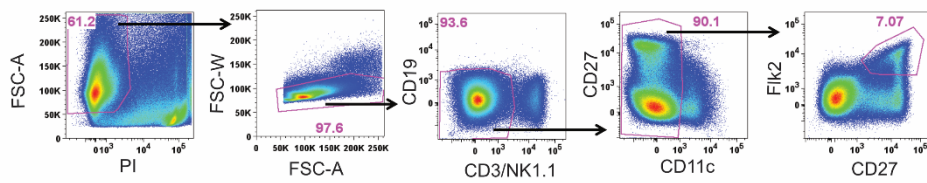

B

Parental, recipient and eight F1 donor strains for the multicongenic barcoding experiment

| Parental Strains        | CD45.1; Thy1.2     | CD45.2; Thy1.2                       | GFP+;<br>CD45.2; Thy1.2             | CD45.2; Thy1.1                        |
|-------------------------|--------------------|--------------------------------------|-------------------------------------|---------------------------------------|
| CD45.1; Thy1.2          | (1) CD45.1; Thy1.2 | (2) CD45.1; CD45.2;<br>Thy1.2        | (3) GFP+; CD45.1;<br>CD45.2; Thy1.2 | (4) CD45.1; CD45.2;<br>Thy1.1; Thy1.2 |
| CD45.2; Thy1.2          |                    | CD45.2; Thy1.2<br>(Recipient strain) | (5) GFP+; CD45.2;<br>Thy1.2         | (6) CD45.2; Thy1.1;<br>Thy1.2         |
| GFP+;<br>CD45.2; Thy1.2 |                    |                                      |                                     | (7) GFP+; CD45.2;<br>Thy1.1; Thy1.2   |
| CD45.2; Thy1.1          |                    |                                      |                                     | (8) CD45.2; Thy1.1                    |

C

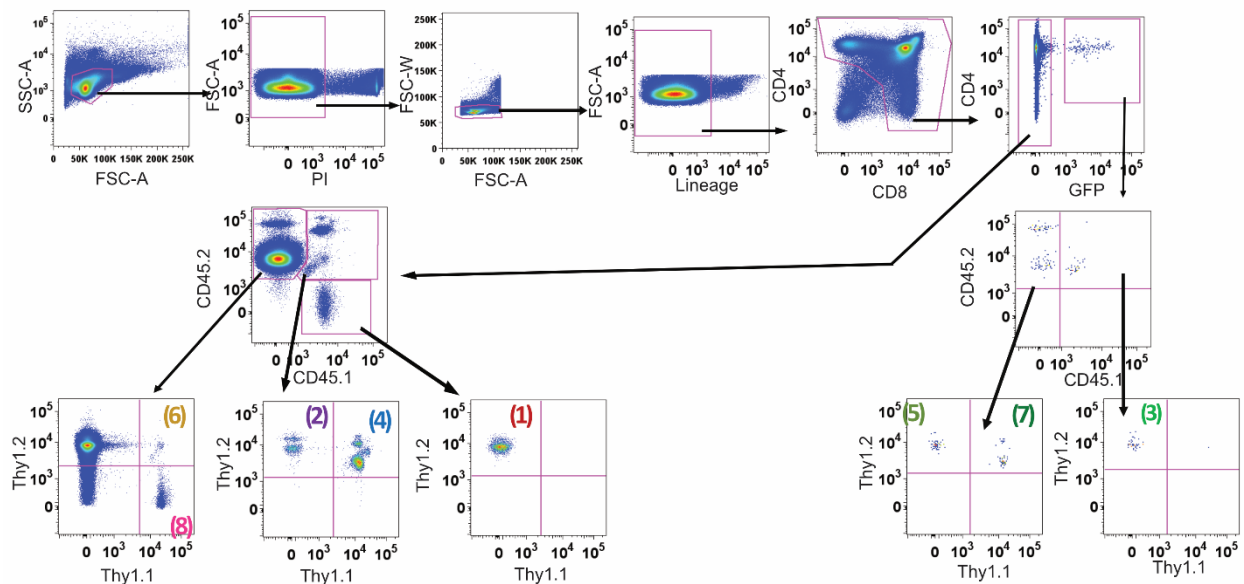

Supplementary Figure 2, related to Figure 2. Identification of donor strain-derived

thymocytes in recipient thymuses following transfer of multicongenic progenitors. (A)

Representative gating strategy used for sorting multicongenic Flk2<sup>+</sup> CD27<sup>+</sup> progenitors. BM from

all donors were depleted of mature lineages with antibodies against CD11b, CD11c, CD19, B220, Gr-1, NK1.1 and Ter-119. CD3<sup>+</sup>, NK1.1<sup>+</sup> and CD11c<sup>+</sup> cells were excluded by gating and Flk2<sup>+</sup> CD27<sup>+</sup> progenitors were FACS sorted. (B) Eight distinct congenic F1 donor strains were generated by intercrossing CD45.1, CD45.2, GFP, and Thy1.1 strains. (C) Representative gating strategy to identify individual donor strains color-coded as in (B) 21d after i.v. transfer into non-irradiated 1MO, 3MO, 6MO and 12MO C57BL6/J recipient mice. The experiment was performed 4 times, with n = 10-12 recipients per age.

# Supplementary Figure 3

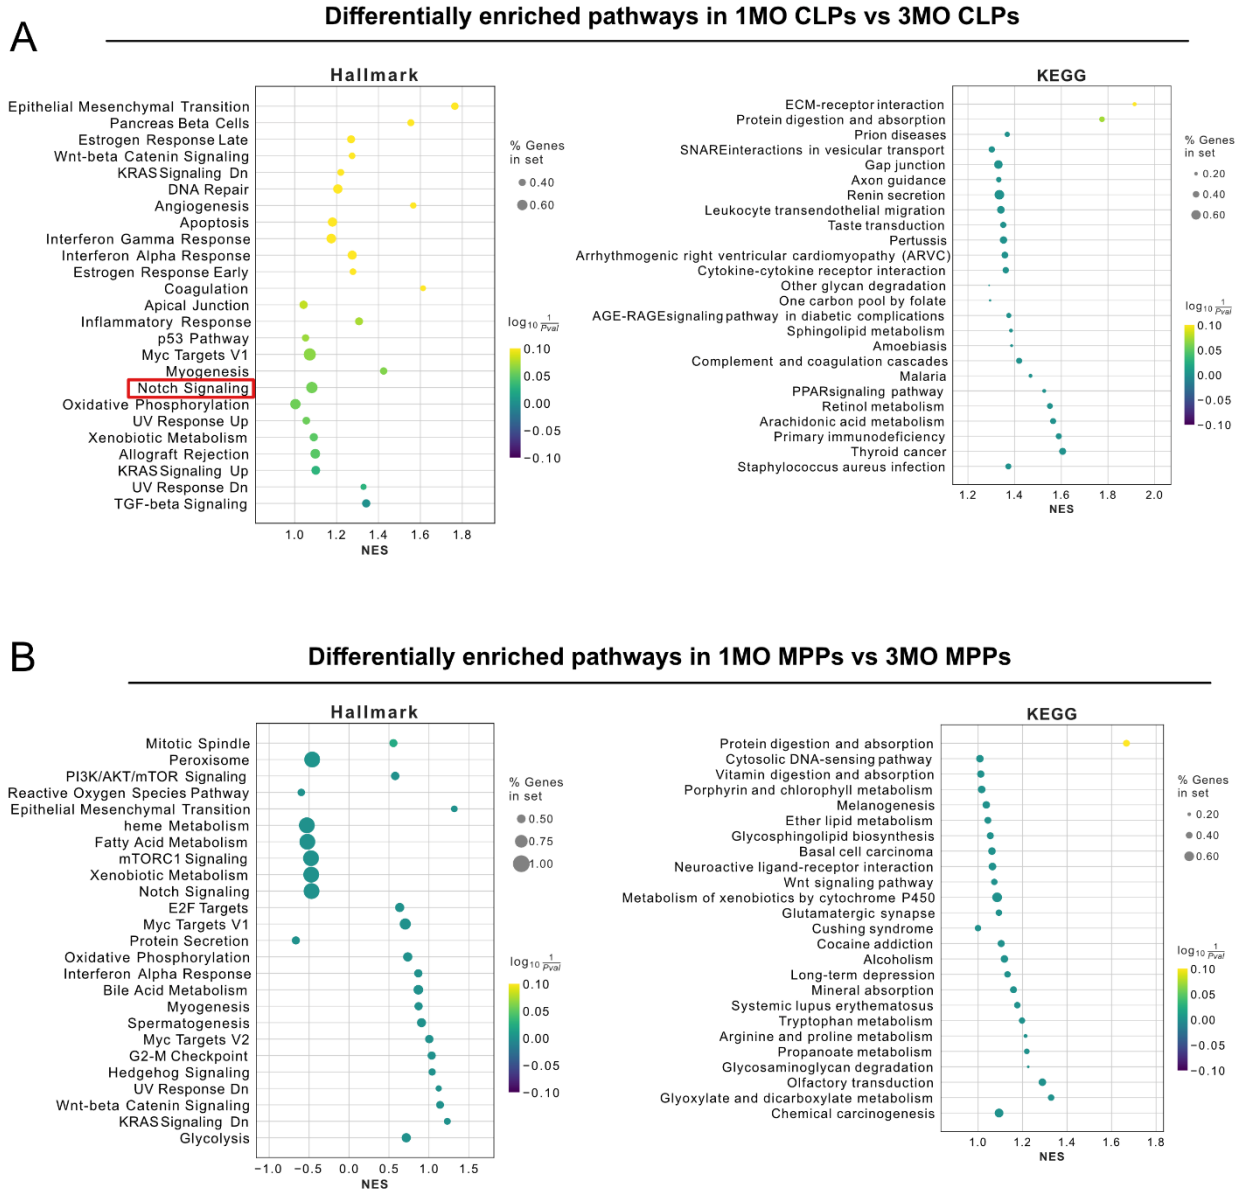

Supplementary Figure 3, related to Figure 5. Differentially enriched pathways in 1MO versus 3MO Ly6d<sup>+</sup> CLPs and Flk2<sup>+</sup> MPPs. (A-B) Dot plots representing the top 25 differentially enriched Hallmark and KEGG pathways, ranked by normalized enrichment scores (NES), upregulated or downregulated in (A) 1MO CLPs and (B) 1MO MPPs, compared to their 3MO counterparts, as identified by gene set enrichment analysis. Positive NES indicates pathways that are

upregulated in 1MO CLPs and MPPs, while a negative NES represents upregulation of the respective pathways in 3MO CLPs and MPPs. Data are averaged from 3 independent biological replicates of 1MO and 3MO CLPs and MPPs.

# Supplementary Figure 4

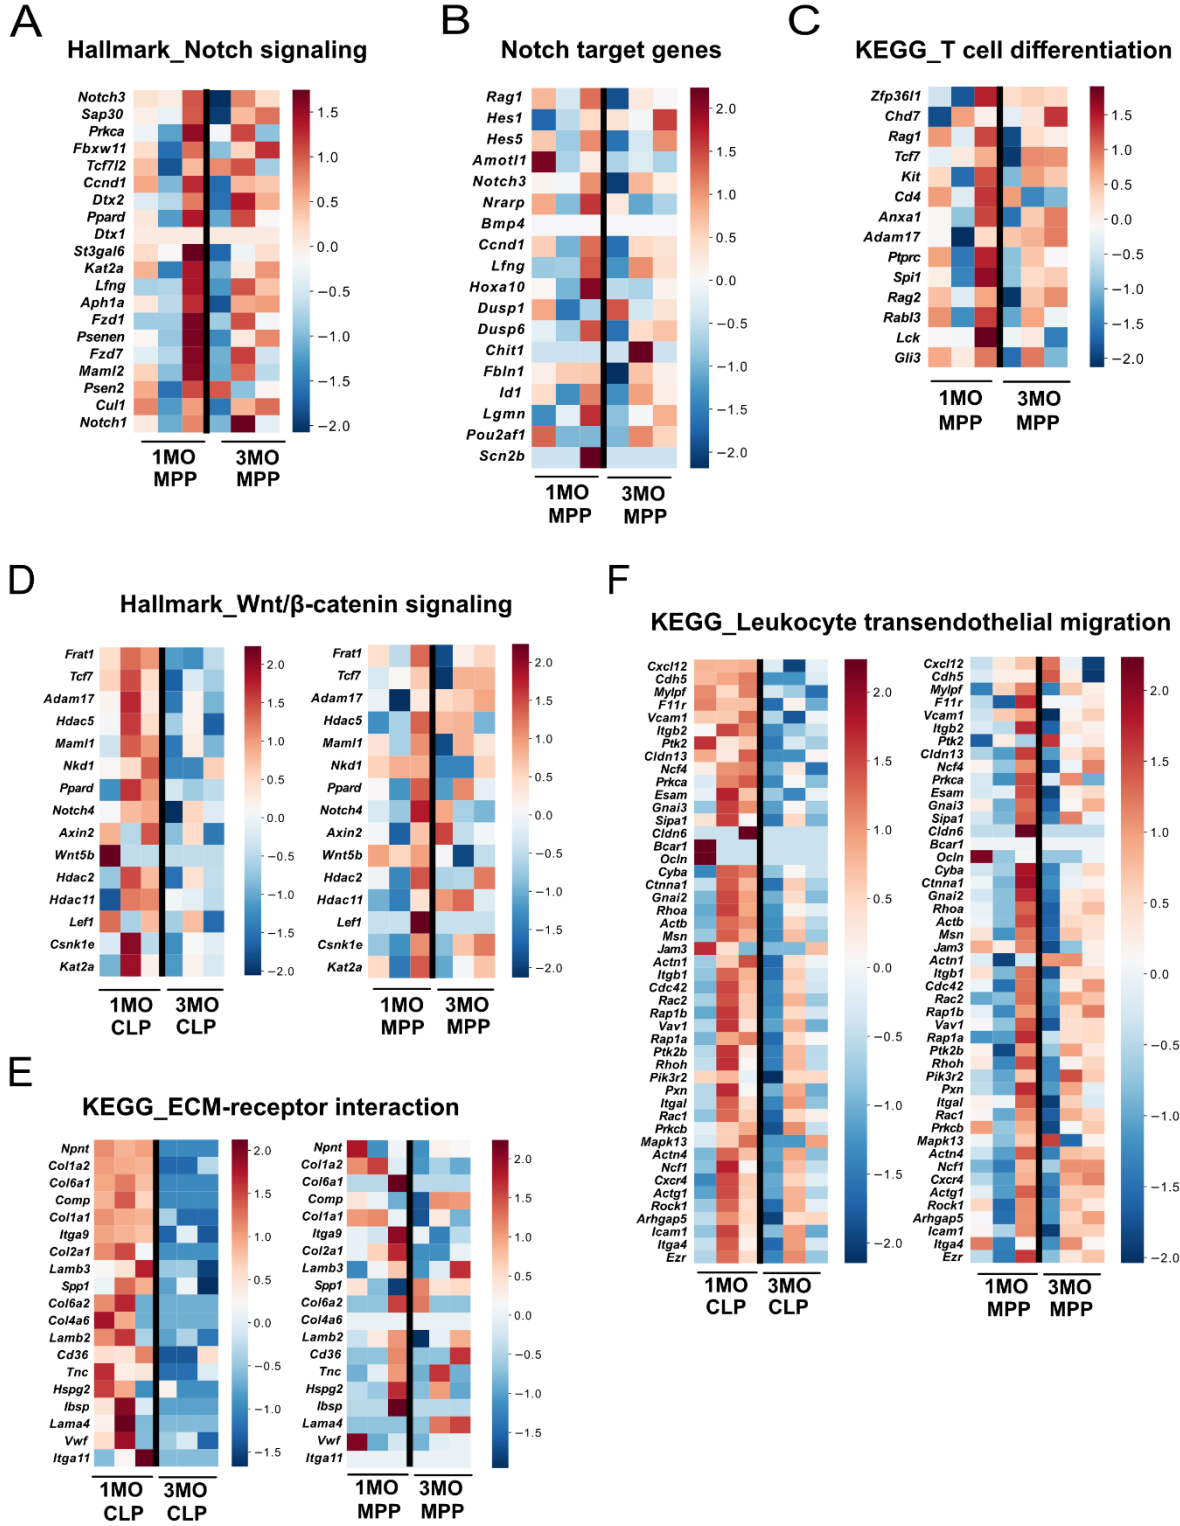

**Supplementary Figure 4, related to Figure 5. Age-associated decline in enrichment of signaling and adhesion pathways in 3MO versus 1MO Ly6d<sup>-</sup> CLPs.** (A-C) Heatmaps show row-normalized z-scores of gene expression values indicating lack of enrichment of (A) the Notch signaling pathway genes (Hallmark), (B) Notch target genes, and (C) the T cell differentiation (KEGG) pathway in 1MO versus 3MO Flk2<sup>+</sup> MPPs (N=3 independent experiments). (D-F) Heatmaps show row-normalized z-scores of gene expression values for genes associated with (D) Wnt/ $\beta$ -catenin signaling (Hallmark), (E) ECM-receptor interaction (KEGG), and (F) Leukocyte transendothelial migration (KEGG) pathways in 1MO and 3MO Ly6d<sup>-</sup> CLPs (left) and Flk2<sup>+</sup> MPPs (right). (A-E) Data are derived from 3 independent experiments.

## Supplementary Figure 5

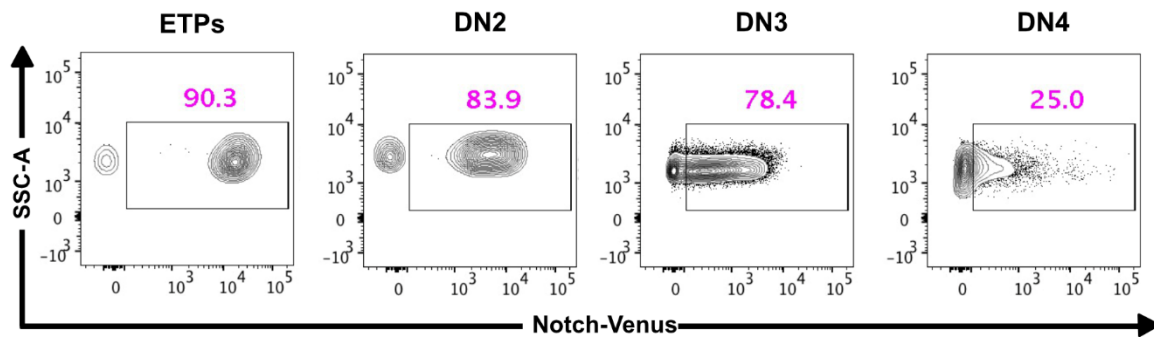

Supplementary Figure 5, related to Figure 6. Notch-Venus signaling reporter demonstrates **faithful expression by immature thymocyte subsets**. Representative flow cytometry plots show the frequency of cells undergoing Notch signaling as well as Venus expression levels in the Notch-Venus reporter mouse strain for the indicated thymocyte DN subsets.



**Supplementary Table 1: List of Antibodies**

| Target                           | Fluorophore  | Manufacturer                | Clone        | Dilution |
|----------------------------------|--------------|-----------------------------|--------------|----------|
| B220                             | PE/Cy5       | eBioscience                 | RA3-6B2      | 1:50     |
| anti-BrdU                        | APC          | BD Biosciences              |              | 1:100    |
| Cleaved Caspase-3                | BV421        | Cell Signaling Technologies | D3E9         | 1:100    |
| CD3                              | PE/Cy5       | BioLegend                   | 145-2C11     | 1:50     |
| CD3                              | PE/Cy7       | BioLegend                   | 145-2C11     | 1:200    |
| CD4                              | BV510        | BioLegend                   | RM4-5        | 1:100    |
| CD4                              | PE           | BD Pharmingen               | RM4-5        | 1:200    |
| CD8                              | PE/Cy7       | eBioscience                 | 53-6.7       | 1:80     |
| CD8                              | APC/Cy7      | BioLegend                   | 53-6.7       | 1:200    |
| CD11b                            | PE/Cy5       | Tonbo Biosciences           | M1/70        | 1:50     |
| CD11c                            | PE/Cy5       | BioLegend                   | N418         | 1:50     |
| CD11c                            | PerCP/Cy5.5  | Tonbo Biosciences           | N418         | 1:200    |
| CD25                             | FITC         | BD Pharmingen               | 7D4          | 1:40     |
| CD25                             | AF700        | BioLegend                   | PC61         | 1:800    |
| CD25                             | Pacific Blue | BioLegend                   | PC61         | 1:50     |
| CD27                             | APC          | BioLegend                   | LG.3A10      | 1:200    |
| CD27                             | PE/Cy7       | BioLegend                   | LG.3A10      | 1:200    |
| CD44                             | APC          | BioLegend                   | IM7          | 1:50     |
| CD44                             | FITC         | Tonbo Biosciences           | IM7          | 1:400    |
| CD45                             | PerCP/Cy5.5  | Invitrogen                  | 30-F11       | 1:100    |
| CD45                             | BV510        | BioLegend                   | 30-F11       | 1:100    |
| CD45.1                           | APC          | BioLegend                   | A20          | 1:200    |
| CD45.2                           | PE/Cy7       | BioLegend                   | 104          | 1:150    |
| c-kit (CD117)                    | APC/Cy7      | BioLegend                   | 2B8          | 1:40     |
| EpCAM                            | APC          | BioLegend                   | G8.8         | 1:300    |
| Flk-2 (CD135)                    | PE           | BioLegend                   | A2F10        | 1:200    |
| Flk2 (CD135)                     | APC          | BioLegend                   | A2F10        | 1:50     |
| Gr-1                             | PE/Cy5       | BioLegend                   | RB6-8C5      | 1:50     |
| IL-7R (CD127)                    | Biotin       | BioLegend                   | A7R34        | 1:100    |
| Ly51                             | PE           | BioLegend                   | 6C3          | 1:300    |
| Ly6D                             | PE           | BioLegend                   | 49-H4        | 1:200    |
| I-A/I-E (MHC-II)                 | APC/Cy7      | BioLegend                   | M5/114.15.2  | 1:200    |
| NK1.1                            | PE/Cy5       | BioLegend                   | PK136        | 1:50     |
| NK1.1                            | PE/Cy7       | BioLegend                   | PK136        | 1:200    |
| Notch1                           | PE           | BioLegend                   | HMN1-12      | 1:100    |
| Sca-1                            | Pacific Blue | BioLegend                   | D7           | 1:200    |
| TCR $\beta$                      | AF700        | BioLegend                   | H57-597      | 1:50     |
| TCR $\beta$                      | PE           | BioLegend                   | H57-597      | 1:40     |
| TCR $\gamma/\delta$              | PE           | eBioscience                 | eBioGL3      | 1:40     |
| Ter-119                          | PE/Cy5       | eBioscience                 | TER-119      | 1:50     |
| Thy1.1                           | AF700        | BioLegend                   | OX-7         | 1:200    |
| Thy1.2                           | BV510        | BioLegend                   | 30-H12       | 1:100    |
| UEA-1                            | FITC         | Vector Laboratories         |              | 1:500    |
| Fixable viability dye-zombie red |              | BioLegend                   |              | 1:1000   |
|                                  | Qdot®605     | Invitrogen                  | Streptavidin | 1:200    |
| CD31                             | Pacific blue | BioLegend                   | 390          | 1:200    |
